# Supplementary material
Source: HighWire-hosted journal article supplement (https://clincancerres.aacrjournals.org/content/suppl/2013/05/20/1078-0432.CCR-13-0380)

## Supplementary Fig. S1: Correlation between Variables

### A. Correlation matrix; p values

| Overall response |             |        |                       |                         |                                  |               |                |                                                              |                           |                                              |                                                   |                                      |                    |                      |               |             |                    |          |            |                  |
|------------------|-------------|--------|-----------------------|-------------------------|----------------------------------|---------------|----------------|--------------------------------------------------------------|---------------------------|----------------------------------------------|---------------------------------------------------|--------------------------------------|--------------------|----------------------|---------------|-------------|--------------------|----------|------------|------------------|
| .747             | Patient age |        |                       |                         |                                  |               |                |                                                              |                           |                                              |                                                   |                                      |                    |                      |               |             |                    |          |            |                  |
| .015             | .233        | Female |                       |                         |                                  |               |                |                                                              |                           |                                              |                                                   |                                      |                    |                      |               |             |                    |          |            |                  |
| .114             | .311        | .409   | BRAF <sup>V600E</sup> |                         |                                  |               |                |                                                              |                           |                                              |                                                   |                                      |                    |                      |               |             |                    |          |            |                  |
| .315             | .915        | .089   | .080                  | ECOG performance status |                                  |               |                |                                                              |                           |                                              |                                                   |                                      |                    |                      |               |             |                    |          |            |                  |
| .011             | .899        | .099   | .035                  | .115                    | High lactate dehydrogenase (LDH) |               |                |                                                              |                           |                                              |                                                   |                                      |                    |                      |               |             |                    |          |            |                  |
| .214             | .169        | .093   | .102                  | .837                    | .654                             | >5 metastasis |                |                                                              |                           |                                              |                                                   |                                      |                    |                      |               |             |                    |          |            |                  |
| .060             | .623        | .422   | 0                     | .054                    | .005                             | .972          | High M staging |                                                              |                           |                                              |                                                   |                                      |                    |                      |               |             |                    |          |            |                  |
| .374             | .008        | .454   | 0                     | .014                    | .071                             | .990          | .016           | No. of interleukin-2 (IL-2) doses administered to be patient |                           |                                              |                                                   |                                      |                    |                      |               |             |                    |          |            |                  |
| .064             | .545        | .607   | .238                  | .717                    | .134                             | .598          | .734           | .468                                                         | Fold expansion during REP |                                              |                                                   |                                      |                    |                      |               |             |                    |          |            |                  |
| .098             | .041        | .464   | .628                  | .543                    | .784                             | .339          | .724           | .127                                                         | 0                         | % CD8 <sup>+</sup> cells in infusion product |                                                   |                                      |                    |                      |               |             |                    |          |            |                  |
| .024             | .068        | .238   | .975                  | .779                    | .116                             | .309          | .762           | .548                                                         | 0                         | 0                                            | No. of CD8 <sup>+</sup> cells in infusion product |                                      |                    |                      |               |             |                    |          |            |                  |
| .042             | .341        | .470   | .429                  | .442                    | .061                             | .668          | .562           | .648                                                         | 0                         | 0                                            | 0                                                 | Total no. of TIL in infusion product |                    |                      |               |             |                    |          |            |                  |
| .019             | .987        | .454   | .603                  | .683                    | .066                             | .323          | .621           | .836                                                         | .013                      | .820                                         | .031                                              | .020                                 | TIL culture period |                      |               |             |                    |          |            |                  |
| .718             | .709        | .311   | .678                  | .729                    | .864                             | .182          | .726           | .370                                                         | .569                      | .147                                         | .207                                              | .230                                 | .036               | Pulmonary congestion |               |             |                    |          |            |                  |
| .790             | .534        | .320   | .976                  | .237                    | .976                             | .553          | .410           | .664                                                         | .102                      | .603                                         | .298                                              | .071                                 | .235               | .769                 | Renal failure |             |                    |          |            |                  |
| .898             | .971        | .810   | .806                  | .164                    | .654                             | .674          | .136           | .088                                                         | .750                      | .332                                         | .598                                              | .704                                 | .182               | .038                 | .553          | Hypotension |                    |          |            |                  |
| .114             | .792        | .567   | .008                  | .637                    | .524                             | .122          | .017           | .518                                                         | .919                      | .204                                         | .569                                              | .704                                 | .427               | .866                 | .648          | .561        | Hyperbilirubinemia |          |            |                  |
| .744             | .212        | .360   | .581                  | .057                    | .741                             | .095          | .043           | .204                                                         | .852                      | .685                                         | .755                                              | .697                                 | .209               | .828                 | .790          | .521        | .169               | Diarrhea |            |                  |
| .414             | .624        | 1      | .152                  | .297                    | .821                             | .334          | .367           | .157                                                         | .456                      | .915                                         | .624                                              | .327                                 | .379               | .459                 | .364          | .661        | .465               | .503     | Prior IL-2 |                  |
| .937             | .266        | .374   | .004                  | .607                    | .728                             | .366          | .025           | .003                                                         | .023                      | .112                                         | .012                                              | .006                                 | .349               | .372                 | .138          | .554        | .354               | .096     | .006       | Prior ipilimumab |

### B. Correlation matrix; Kendall's $\tau$ coefficient

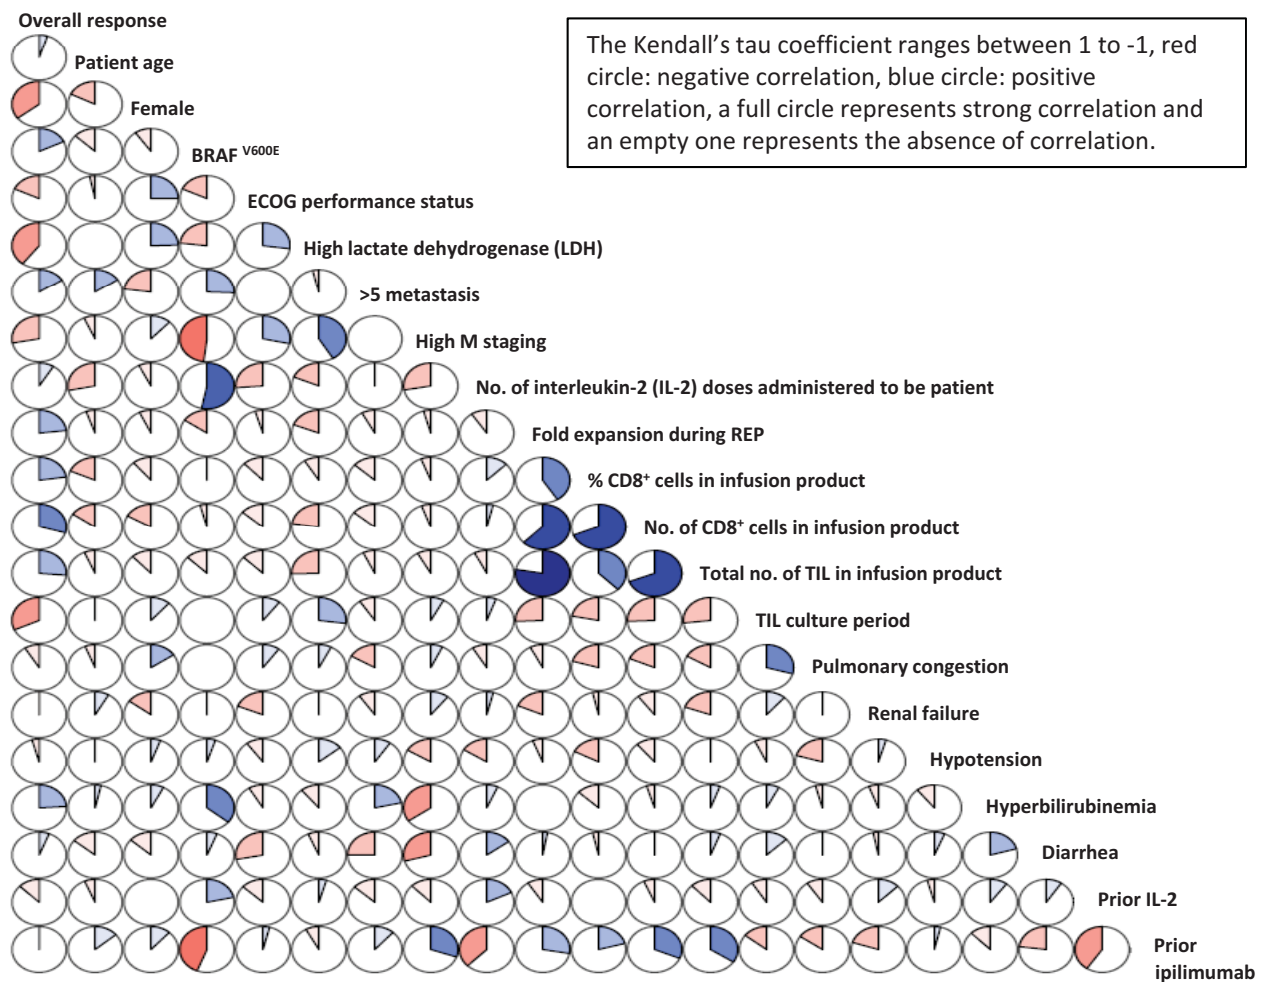

Supplement: fig1.pdf [file fig1.pdf]
